## **Changes in pregnancy-related serum biomarkers early in gestation are associated with later development of preeclampsia**

Shiying HAO<sup>1,2\*</sup>, Jin YOU<sup>3\*</sup>, Lin CHEN<sup>3\*</sup>, Hui ZHAO<sup>4\*</sup>, Yujuan HUANG<sup>5\*</sup>, Le ZHENG<sup>1,2</sup>, Lu TIAN<sup>6</sup>, Ivana MARIC<sup>7</sup>, Xin LIU<sup>3</sup>, Tian LI<sup>3</sup>, Ylayaly K. BIANCO<sup>8</sup>, Virginia D. WINN<sup>8</sup>, Nima AGHAEPOUR<sup>9</sup>, Brice GAUDILLIERE<sup>9</sup>, Martin S. ANGST<sup>9</sup>, Xin ZHOU<sup>10</sup>, Yu-Ming LI<sup>10</sup>, Lihong MO<sup>11</sup>, Ronald J. WONG<sup>4</sup>, Gary M. SHAW<sup>4</sup>, David K. STEVENSON<sup>4</sup>, Harvey J. COHEN<sup>4</sup>, Doff B. MCELHINNEY<sup>1,2</sup>, Karl G. SYLVESTER<sup>4</sup>, Xuefeng B. LING<sup>2,3†</sup>

<sup>1</sup>Department of Cardiothoracic Surgery, Stanford University School of Medicine, Stanford, CA

<sup>2</sup>Clinical and Translational Research Program, Betty Irene Moore Children's Heart Center, Lucile Packard Children's Hospital, Palo Alto, CA

<sup>3</sup>Department of Surgery, Stanford University School of Medicine, Stanford, CA

<sup>4</sup>Department of Pediatrics, Stanford University School of Medicine, Stanford, CA

<sup>5</sup>Department of Emergency, Shanghai Children's Hospital, Shanghai Jiao Tong University School of Medicine, Shanghai, China

<sup>6</sup>Department of Health Research and Policy, Stanford University, Stanford, CA

<sup>7</sup>Stanford University School of Medicine, Stanford, CA

<sup>8</sup>Department of Obstetrics and Gynecology, Stanford University School of Medicine, Stanford, CA

<sup>9</sup>Department of Anesthesiology, Perioperative, and Pain Medicine, Stanford University School of Medicine, Stanford, CA

<sup>10</sup>Tianjin Key Laboratory of Cardiovascular Remodeling and Target Organ Injury, Pingjin Hospital Heart Center, Tianjin, China

<sup>11</sup>Department of Obstetrics and Gynecology, University of California San Francisco-Fresno, Fresno, CA

†Correspondence: Xuefeng B. Ling, Department of Surgery, Stanford University, [bxling@stanford.edu](mailto:bxling@stanford.edu)

\*Co-first authors

1 **ABSTRACT**

2 **Background:** Placental protein expression plays a crucial biological role during normal and  
3 complicated pregnancies. We hypothesized that: (1) circulating pregnancy-associated, placenta-  
4 related protein levels throughout gestation reflect the uncomplicated, full-term temporal  
5 progression of human gestation, and effectively estimates gestational ages (GAs); (2)  
6 pregnancies with underlying placental pathology, such as preeclampsia (PE), are associated with  
7 disruptions in this GA estimation in early gestation; (3) malfunctions of this GA estimation can  
8 be employed to identify impending PE. In addition, to explore the underlying biology and PE  
9 etiology, we set to compare protein gestational patterns of human and mouse, using pregnant  
10 heme oxygenase-1 (HO-1) heterozygote (Het) mice, a mouse model reflecting PE-like  
11 symptoms.

12 **Methods:** Serum levels of circulating placenta-related proteins – leptin (LEP), chorionic  
13 somatomammotropin hormone like 1 (CSHL1), elabela (ELA), activin A, soluble fms-like  
14 tyrosine kinase 1 (sFlt-1), and placental growth factor (PlGF)– were quantified by ELISA in  
15 blood serially collected throughout human pregnancies (20 normal subjects with 66 samples, and  
16 20 PE subjects with 61 samples). Linear multivariate analysis of the targeted serological protein  
17 levels was performed to estimate the normal GA. Logarithmic transformed mean-squared errors  
18 of GA estimations were used to identify impending PE. Then the human gestational protein  
19 patterns were compared to those in the pregnant HO-1 mice.

20 **Results:** An elastic net (EN)-based gestational dating model was developed ( $R^2 = 0.76$ ) and  
21 validated ( $R^2 = 0.61$ ) using the serum levels of the 6 proteins at various GAs from women with  
22 normal uncomplicated pregnancies ( $n = 10$  for training and  $n = 6$  for validation). In pregnancies  
23 complicated by PE ( $n = 14$ ), the EN model was not ( $R^2 = -0.17$ ) associated with GA at sampling

24 in PE. Statistically significant deviations from the normal GA EN model estimations were  
25 observed in PE-associated pregnancies between GAs of 16–30 weeks ( $P = 0.01$ ). The EN model  
26 developed with 5 proteins (ELA excluded due to the lack of robustness of the mouse ELA assay)  
27 performed similarly on normal human ( $R^2 = 0.68$ ) and WT mouse ( $R^2 = 0.85$ ) pregnancies.  
28 Disruptions of this model were observed in both human PE-associated (human:  $R^2 = 0.27$ ) and  
29 mouse HO-1 Het (mouse:  $R^2 = 0.30$ ) pregnancies. LEP out performed sFlt-1 and PlGF in  
30 differentiating impending PE at early human and late mouse gestations.

31 **Conclusions:** As revealed in both human and mouse GA EN analyses, temporal serological  
32 placenta-related protein patterns are tightly regulated throughout normal human pregnancies and  
33 can be significantly disrupted in pathologic PE states. LEP changes earlier during gestation than  
34 the well-established late GA PE biomarkers (sFlt-1 and PlGF). Our HO-1 Het mouse analysis  
35 provides direct evidence of the causative action of HO-1 deficiency in LEP upregulation in a PE-  
36 like murine model. Therefore, longitudinal analyses of pregnancy-related protein patterns in sera,  
37 may not only help in the exploration of underlying PE pathophysiology but also provide better  
38 clinical utility in PE assessment.

39

40 **Keywords:** sFlt-1, chorionic somatomammotropin hormone like 1, placental growth factor,  
41 leptin, activin A, elabela

42

### 43 **BACKGROUND**

44 Placental protein expression plays a crucial biological role during normal pregnancies.  
45 The normal progression of a human pregnancy is associated with a precisely-timed transient  
46 expression of maternal and placental proteins [1, 2]. Similarly, the placenta, an endocrine gland  
47 unique to pregnancy, secretes hormones that fluctuate with respect to the gestational week of

48 pregnancy. However, these hormones have not been useful in the development of molecular  
49 metrics to estimate GA or to phenotype complicated pregnancies prior to overt clinical  
50 manifestations of specific pathologic states like preeclampsia (PE) [3, 4], a pregnancy-related  
51 vascular disorder affecting 5–8% of all pregnancies [5, 6].

52 PE is thought to be a multisystem disorder of pregnancy driven by alterations in placental  
53 function and resolved by the delivery of the placenta and fetus [7]. A few pregnancy-associated,  
54 placenta-related markers have been observed having different patterns in normal pregnancies and  
55 pregnancies with PE. Chorionic somatomammotropin hormone like 1 (CSHL1; also called  
56 human placental lactogen) is selectively expressed in placental villi with an important role in  
57 regulating placental growth. Leptin (LEP) has been suggested to be involved in placental and  
58 fetal growth [8]. The relationship between LEP and PE has been discussed in a few studies [9-  
59 17]. Circulating levels of activin A, a member of the tumor growth factor protein family, can  
60 increase as early as 10–15 weeks of pregnancy in women who subsequently develop PE [18].  
61 Elevated placental levels of angiogenic factors (soluble fms-like tyrosine kinase or sFlt-1) and  
62 decreased levels of anti-angiogenic factors (placental growth factor, PIGF) have been implicated  
63 in the pathogenesis of PE [19-25]. As such, the sFlt-1/PIGF ratio has been proposed as an index  
64 to diagnose and manage PE [26, 27]. A significant increase in sFlt-1 levels was also observed in  
65 sera of pregnant heme oxygenase (HO)-1 heterozygote (Het, HO-1<sup>+/-</sup>) mice, where the deficiency  
66 in HO-1 results in PE-like symptoms [28]. Recent work by Ho et al showed that PE was  
67 associated in mice with a deficiency in elabela (ELA), a placental hormone that enhances human  
68 trophoblast invasiveness in vitro [29].

69 In this study, we chose 6 proteins as candidates of GA estimation because they are  
70 associated with the placenta and reflect placental growth. Furthermore, levels of all 6 proteins

71 differ in PE compared to a normal pregnancy. Previous studies found that LEP, CSHL1, and  
72 activin A are elevated early in gestation in women who subsequently develop PE [30-32]. ELA  
73 deficiency is associated with PE-like symptoms in mice [29]. The ratio of sFlt-1 and PIGF has  
74 been used clinically for diagnosing PE [27].

75 We hypothesized that serum levels of placenta-related proteins, LEP, CSHL1, ELA,  
76 activin A, sFlt-1, and PIGF are longitudinally regulated, and a profile of their circulating levels  
77 may collectively reflect a pregnancy-associated protein panel describing the normal progression  
78 of a term pregnancy. We further hypothesized that disruptions of this panel in early gestation are  
79 associated with placental abnormalities and an increased risk of developing PE. We sought to  
80 model the longitudinal changes in protein serum levels to estimate GA. In addition, we explored  
81 whether temporal disruptions in these profiles early in gestation are harbingers of placental  
82 pathology and subsequent PE. The model was first developed in human sera and then tested in  
83 both human and mouse sera.

## 84 **METHODS**

### 85 **Study design**

86 The study was conducted in three phases: (1) using ELISA methods to characterize the  
87 normal pattern of serum placenta-related protein levels; (2) modeling a protein-based GA  
88 estimation of normal pregnancies and identifying deviations; and (3) exploration of the protein-  
89 based GA estimation with a mouse PE model. Sera were collected in the first, second, or third  
90 trimesters during pregnancy from women who had normal uncomplicated pregnancies or a  
91 diagnosis of PE. Blood was collected at 1 to 3 time-points before week 30 of gestation and prior  
92 to a confirmatory diagnosis of PE. The GA of human was determined by ultrasound  
93 measurement. In the mouse, sera were collected from pregnant HO-1 Het or wild-type (WT)

94 dams at 1 to 3 time-points between 7.5 to 18.5 days of gestation. The HO-1 Het mice have  
95 elevated diastolic blood pressures and plasma sFlt-1 levels during pregnancies, mimicking the  
96 PE syndrome [28]. For the human study, approval was obtained from the Stanford University  
97 Institutional Review Board. Blood was collected at Stanford University Medical Center after  
98 informed consent was obtained.

### 99 **Animal model study**

100 For the mouse study, approval was obtained from the Institutional Animal Care and Use  
101 Committee at Stanford University. Mouse line maintenance, genotyping, and bleeding were as  
102 previously described [28].

### 103 **ELISAs**

104 Sera from human subjects or mice were collected and measured using commercial kits  
105 specific for the human or mouse as follows: LEP (R&D System Inc., MN, USA); CSHL1  
106 (Mybiosource, San Diego, CA, USA); ELA (Peninsula Laboratories International, Inc., San  
107 Carlos, CA, USA); activin A (R&D System Inc.); sFlt-1 (R&D System Inc.); and PIGF (R&D  
108 System Inc.).

### 109 **Statistical analyses**

110 Patient demographic data were analyzed using the “Epidemiological Calculator” (R  
111 epicalc package). Hypothesis testing was performed using Mann-Whitney U-tests (two-tailed).  
112 Samples collected  $\geq 30$  weeks of gestation or having any of the placenta-related protein  
113 measurements out of limits on the standard curves were excluded from the cohort for modeling.  
114 A 10-fold cross-validated elastic net (EN) algorithm [2, 33, 34] was used for multivariate  
115 modeling of the ELISA data. The model searches for an optimum  $\beta$  to minimize the least squared  
116 loss function with elastic net penalty:

117 
$$L(\lambda, \beta) = |y - X\beta|^2 + \lambda\left[\frac{(1-\alpha)|\beta|^2}{2} + \alpha|\beta|\right] \quad (1)$$

118 where  $X=(x_1, \dots, x_6)$  is a matrix of 6 analytes, with  $x_j=(x_{1j}, \dots, x_{nj})^T$ , where  $j=1, \dots, 6$ .  $y = (y_1, \dots, y_n)^T$  is  
119 the response (i.e., current GA).  $n$  is the number of samples in the training cohort.  $|y - X\beta|^2$  is  
120 the squared loss function.  $\lambda\left[\frac{(1-\alpha)|\beta|^2}{2} + \alpha|\beta|\right]$  is the well-known EN penalty used for controlling  
121 the model complexity. The parameters of each penalty were controlled by  $\alpha$  and  $\lambda$ .  $\alpha$  was set to 1  
122 and  $\lambda$  was set to 0.208, which maximizes the predictive value of model measured by  $R^2$  in the  
123 cross-validation (Additional file 1). The model is thus reduced to a lasso-regularized regression.

124 The mean squared error (MSE) of the GA model was used to separate PE patients from  
125 women with normal pregnancies. MSE in each woman was calculated by comparing the  
126 observed GA with the model-predicted GA. Specifically, assuming a woman had estimated GA  
127 of  $\hat{y}_{k1}, \dots, \hat{y}_{km}$  for samples collected at the observed GA of  $y_{k1}, \dots, y_{km}$ , the MSE of the model for  
128 this woman is:

129

130 
$$MSE = \frac{1}{m} \sum_{k=k1}^{km} (\hat{y}_k - y_k)^2 \quad (2)$$

131

132 where  $m$  is the number of samples. To account for the randomness of errors, only women having  
133 2 or more samples collected during pregnancy (i.e.,  $m \geq 2$ ) were included for the calculations.  
134 Receiver operating characteristic (ROC) curves and Mann–Whitney U-tests were used to test the  
135 performance of MSE in classifying women.

136 The EN model in (Eq. 1) was then adjusted using 5 analytes as inputs (ELA was excluded  
137 see below). The model performance was assessed by  $R^2$ . The role of each analyte in  
138 differentiating complicated from normal pregnancies was explored by analyzing the distribution  
139 of the concentrations at different GAs. Comparisons were made between the human and mouse

140 to identify the common behaviors in proteins that were associated with the outcome of PE. Loess  
141 regression, Mann–Whitney U-tests, and fold changes were used for the analyses.

## 142 **RESULTS**

### 143 **Samples**

144 Forty pregnant women (20 term pregnancies, 20 with PE) receiving routine antepartum  
145 care at Stanford University Medical Center were enrolled between November 2012 and May  
146 2016. Patient demographics are listed in Table 1. Maternal blood was collected at one, two, or  
147 three time-points during each pregnancy (at early, mid, and late-pregnancies, Fig. 1A). 10  
148 women (4 normal pregnancies, 6 with PE) were excluded from the EN-based modeling because  
149 samples either were not collected before 30 weeks of gestation or had at least 1 protein candidate  
150 that was out of limits on its standard curve. The latter was done because outliers on the standard  
151 curve might cause distortion of continuous regression analysis. There were 30 women (16  
152 normal pregnancies, 14 with PE) left after exclusion. Our training cohort included 10 patients  
153 who delivered at term ( $\geq 37$  weeks GA). An independent cohort of 6 women who delivered at  
154 term and 14 women diagnosed with PE were subsequently enrolled for the validation study on  
155 normal pregnancy and the test on PE.

156 **Table 1. Subject demographics**

| <b>Characteristic</b>        | <b>Overall Normal (n = 20)</b> | <b>PE (n = 20)</b> |
|------------------------------|--------------------------------|--------------------|
| <b>Race, No. (%)</b>         |                                |                    |
| <b>White</b>                 | 20 (100)                       | 9 (45)             |
| <b>Asian</b>                 | 0 (0)                          | 5 (25)             |
| <b>African-American</b>      | 0 (0)                          | 1 (5)              |
| <b>Other</b>                 | 0 (0)                          | 5 (25)             |
| <b>Age, mean (SD), years</b> | 31.9 (4.8)                     | 31.8 (6.0)         |



|                                         |            |            |
|-----------------------------------------|------------|------------|
| <b>GA at delivery, mean (SD), weeks</b> | 39.5 (1.2) | 36.7 (3.3) |
|-----------------------------------------|------------|------------|

---

157

158 The approach was also tested with serum samples collected longitudinally from pregnant  
159 WT (n = 3 with 11 samples) and HO-1 Het (n = 4 with 15 samples) mice (Additional file 2).  
160 Each mouse had 3 or 4 samples collected at E7.5, E10.5, E14.5, and E18.5.

### 161 **A placenta-related, protein-based GA estimation of human pregnancy**

162 We hypothesized that circulating placenta-related protein expression throughout  
163 pregnancy reflects the normal temporal progression of human gestation, and effectively serves to  
164 estimate GA. Using an EN algorithm, we developed a 6-protein model using a training cohort of  
165 10 pregnant women that was strongly associated with GA at the time of sampling ( $R^2 = 0.76$ ,  $P =$   
166  $2 \times 10^{-7}$ , Fig. 1B, left panel). The EN model was prospectively tested using sera serially collected  
167 from an additional 6 normal, full-term pregnant women. The EN model was found to predict GA  
168 at time of sampling in this independent normal cohort ( $R^2 = 0.61$ ,  $P = 2 \times 10^{-4}$ , Fig. 1B, middle  
169 panel). Univariate analyses and EN model coefficients of each protein in the model are shown in  
170 Additional file 3 and 4. Together, the analyses confirmed that there is a highly-regulated  
171 temporal pattern of protein levels in sera over the course of pregnancy (Fig. 1B).

### 172 **The placenta-related, protein-based GA estimation malfunctions in PE**

173 Based on the above findings, we hypothesized that our EN model can identify abnormal  
174 phenotypes, such as in PE that may have an attendant disrupted placenta-related protein pattern.  
175 In contrast to the normal cohort (training  $R^2 = 0.76$  and testing  $R^2 = 0.61$ , Fig. 1B), the EN model  
176 did not predict GA at time of sampling and yielded random data predictions in the PE cohort  
177 (Fig. 1B, right panel,  $R^2 = -0.17$ ,  $P = 0.2$ ). These findings suggest that the protein-based GA  
178 estimation is disrupted in PE.

179 The pathogenesis of PE is complex and progresses from an asymptomatic stage,  
 180 characterized by placental abnormalities during the first trimester to a symptomatic stage with  
 181 proteinuria and hypertension in late gestation [35]. Our analyses revealed unique longitudinal  
 182 patterns of serum protein levels of specific biomarkers (Fig. 2): LEP, CSHL1, and ELA  
 183 differentiated PE from the sera of women with uncomplicated, full-term pregnancies at  
 184 approximately 10 weeks of gestation, indicating that the pathogenesis of PE may arise very early  
 185 in gestation. Differences in activin A begin to appear around 20 weeks and in sFlt-1 and PlGF  
 186 after 25 weeks. Examination of the pattern of protein levels revealed significant protein-specific  
 187 gestational windows (0–9, 10–14, 15–25, 26–33, and 27–38 weeks GA, Additional file 5 and  
 188 Table 2) for each biomarker. These findings are in line with our longitudinal biomarker trending  
 189 analyses (Fig. 2). Since there is a positive association [8] between maternal serum LEP  
 190 concentrations and body mass index (BMI) (and consequently, gestational weight gain) during  
 191 pregnancy, our analyses of LEP levels were repeated using BMI in order to normalize for serum  
 192 LEP abundance. Similar findings were obtained (Additional file 6). Taken together, these data  
 193 indicate that alterations in the pattern of serum protein levels of LEP, CSHL1, and ELA begin  
 194 much earlier in GA than the changes in sFlt-1 (increase) and PlGF (decrease) at late GA.  
 195

196 **Table 2. Comparisons of the serum levels of each protein between normal and PE**  
 197 **pregnancies.** Mann-Whitney U-test *P*-value was calculated. \*0.005<*P*<0.05. \*\**P*<0.005.

|                  | 0–9 weeks<br>GA | 10–14 weeks<br>GA | 15–25 weeks<br>GA     | 26–33 weeks<br>GA | 27–38 weeks<br>GA     |
|------------------|-----------------|-------------------|-----------------------|-------------------|-----------------------|
| <b>LEP</b>       | 0.02*           | 0.02*             | 3x10 <sup>-6</sup> ** | 0.3               | 0.5                   |
| <b>CSHL1</b>     | 0.4             | 0.01*             | 0.3                   | 0.7               | 0.9                   |
| <b>ELA</b>       | 0.9             | 0.03*             | 0.9                   | 0.8               | 0.4                   |
| <b>Activin A</b> | 0.5             | 0.5               | 0.8                   | 0.04*             | 0.2                   |
| <b>sFlt-1</b>    | 0.2             | 0.3               | 0.8                   | 0.02*             | 3x10 <sup>-3</sup> ** |
| <b>PlGF</b>      | 0.6             | 0.9               | 0.5                   | 0.3               | 0.01*                 |

198

## 199 **Disruption of the protein-based GA estimation identifies impending PE**

200 Our placenta-related protein-based GA estimation characterizes the gestational progression  
201 of normal term pregnancies. Significant random disruptions of this normal “term” pattern were  
202 observed in women with PE. Logarithm-transformed MSE of our EN estimations were utilized to  
203 define the binary classifications to identify risk for impending PE (Fig. 3 and Additional file 7).  
204 For samples collected at 0–30 weeks GA, the MSE metric differentiated normal from PE (Mann-  
205 Whitney U-test  $P = 0.01$  on the training cohort, and  $P = 0.06$  on the testing cohort) with an area  
206 under the curve (AUC) of 0.88 on the training and 0.79 on the testing cohorts. An optimized  
207 cutoff value calculated on the training data yielded a positive predictive value (PPV) of 0.79 with  
208 a sensitivity of 1.00, and a negative predictive value (NPV) of 1.00 with a specificity of 0.50 on  
209 the testing data. In contrast, in a window of 16–30 weeks of gestation, performance was  
210 improved: Mann-Whitney U-test ( $P = 8 \times 10^{-3}$  on the training and  $P = 0.01$  on the testing) and  
211 AUC of 0.97 on the training and 1 on the testing data, PPV of 1.00 with a sensitivity of 0.88, and  
212 NPV of 0.75 with a specificity of 1.00 on the testing data. These results are better than using a  
213 single biomarker on the testing data in a window of 16–30 weeks of gestation (with AUCs of  
214 0.53 for LEP; 0.76 for CHSL1; 0.58 for ELA; 0.53 for activin A; 0.65 for sFlt-1; and 0.65 for  
215 PlGF). Thus, our results demonstrate that significant disruptions in the protein-based GA  
216 estimation can be used to identify risk for impending PE.

## 217 **A placenta-related, protein-based GA estimation with reduced number of features**

218 Due to the lack of robustness of the mouse ELA ELISA assay, we tested the performance  
219 our EN-based model excluding ELA. The model had an  $R^2$  of 0.72 and 0.61 on the training and  
220 testing cohorts, respectively (Additional file 8). Protein pattern disruptions were observed at > 30  
221 weeks of gestation in women with PE ( $R^2 = 0.27$ , Additional file 8). Similar to the 6-protein

222 model, the 5-protein model was still able to estimate GA during normal pregnancies.

### 223 **Comparative analysis of serological GA estimation between the human and a mouse model**

224 We hypothesized that similar temporal placenta-related protein expression patterns  
225 should be conserved in mouse pregnancies, therefore, we explored our EN-based 5-protein  
226 model to normal and pregnant HO-1 Het mice, a mouse model reflecting PE-like symptoms.  
227 Model coefficients were adjusted to establish the link between GA (in days) and the targeted  
228 serum protein levels. The model had an  $R^2$  of 0.85 for pregnant WT and 0.30 for HO-1 Het mice  
229 with PE-like symptoms (Fig. 4 and Additional file 9). Fold changes of protein levels of HO-1  
230 Het over normal pregnancies were calculated and then compared between the human and mouse  
231 in early (human: 5–26 weeks; mouse: 7.5–14.5 days) and late (human: 27–38 weeks; mouse:  
232 18.5 days) gestations separately. The largest fold change was observed in LEP at late gestation of  
233 mice (Additional file 9). Unlike mice, LEP levels were elevated in women with PE in early  
234 gestation (Fig. 2, Additional file 5, and Table 2). Fold changes of sFlt-1 and PlGF in mice  
235 increased from early to late gestation. The temporal patterns of sFlt-1 in mice were similar to  
236 those in human, which decreased in early gestation and increased in late gestation of complicated  
237 pregnancies (Additional file 9). In contrast, PlGF increased in mice at late gestation, but  
238 decreased in human pregnancies after 27 weeks GA.

### 239 **DISCUSSION**

240 The placenta plays a key role in fetal development, where cell communication occurs to  
241 support nutrition acquisition, immune adaption, and other functions of maternal-fetal interaction  
242 [36, 37]. Placental proteins are expressed in a time-dependent manner and cross-talk with other  
243 organs, such as the thyroid, pituitary, and ovary, and are necessary to ensure normal fetal  
244 development. Characterization of the temporal patterns of circulating placental proteins may

245 serve as a basis for understanding the biology underlying both normal and pathological  
246 pregnancies. Our results support our hypothesis that multivariate modeling of the levels of  
247 circulating placental-secreted proteins, LEP, CSHL1, ELA, activin A, sFlt-1, and PlGF can be  
248 used to estimate GA during the course of a normal pregnancy, but not in women with PE. The  
249 longitudinal placental-related protein pattern in sera was also observed in pregnant WT mice but  
250 not in pregnant HO-1 Het mice.

251 Early diagnosis of PE remains a challenge in clinical settings. The traditional diagnosis of  
252 PE is based on the presence of maternal hypertension and proteinuria [38]. Previous  
253 transcriptomic [39-45] and proteomic [2, 46-50] profiling of normal and complicated  
254 pregnancies have identified disease-specific expression patterns and signaling networks, which  
255 suggest candidate biomarkers for possible early clinical diagnoses and for offering new  
256 biological insights. Our findings suggest that a composite placental-related protein panel from  
257 serial blood collection (for MSE calculations) may provide a diagnostic test to assess PE earlier  
258 (~10 weeks of gestation) than previously suggested by sFlt-1 and PlGF (25 weeks of gestation).  
259 Therefore, this model may offer a new investigational approach towards the understanding of  
260 placental biology during pregnancy as well as guiding innovative methods for PE diagnosis.

261 Our findings of serum protein levels during a normal pregnancy are consistent with those  
262 from previous studies. They are in line with the ranges reported in healthy pregnancies and have  
263 similar patterns during the pregnancy as previous results [51-59]. We found that LEP increased  
264 continuously during the first and second trimesters. Activin A remained stable between 10–20  
265 weeks of gestation and increased late in the second trimester. sFlt-1 levels were also unchanged  
266 before 30 weeks, while PlGF progressively rose over pregnancy. We further integrated the  
267 quantitative trending information of each individual protein into a continuous regression model

268 that expressed GA as a linear combination of the levels of proteins.

269 Current challenges in the management of PE include lack of early assessment and  
270 incomplete understanding of its pathogenesis and pathophysiology at early GAs. sFlt-1 and PIGF  
271 are well-established PE biomarkers [60] with clinical prognostic utilities in PE management. The  
272 ratio of sFlt-1 and PIGF has been shown to effectively differentiate PE from normal term  
273 pregnancies after 25 weeks of gestation [27]. Our findings that LEP, CSHL1, activin a, and ELA  
274 have unique serum protein signatures, starting from early to mid-gestation, are novel and that  
275 disruptions in the normal temporal placenta-related protein pattern appear at earlier GA than the  
276 conventional PE biomarkers sFlt-1 or PIGF. The presence of high levels of LEP in early  
277 gestation may signify the impending development of PE and thus serve as an early biomarker of  
278 PE. Our analyses show that LEP can differentiate PE from normal term pregnancies at <25  
279 weeks ( $P = 3 \times 10^{-6}$  at 15–25 weeks), earlier than sFlt-1, which is consistent with the previous  
280 findings of other studies [61, 62]. Given that LEP is a master regulator of energy expenditure, the  
281 observations suggest that placental insufficiency through energy imbalance is a precursor to PE  
282 that is manifested as hypertension in mid-late gestation.

283 Our characterization of temporal patterns of protein levels in mice provided additional  
284 support for our hypothesis. Applying our multivariate EN modeling on mouse sera we also found  
285 an association of protein levels and GA during normal mouse pregnancies, and this relationship  
286 was disrupted in pregnant HO-1 Het mice. Among the 5 proteins studied, LEP had the largest  
287 fold change in PE-like (HO-1 Het) pregnancies. The main action of leptin is in the maternal  
288 interface during the first stage of pregnancy regulating angiogenesis, growth and  
289 immunomodulation on the placenta [63-69]. Although dysregulation of leptin levels has been  
290 found correlated with the pathogenesis of various pregnancy disorders [70], including PE, the

291 exact mechanism of action and upstream regulators remain unknown. Our characterization of the  
292 pregnant HO-1 Het mouse PE model, for the first time, provides direct evidence of the causative  
293 action of HO-1 deficiency in leptin upregulation in a PE-like murine model. This result, together  
294 with the significant differentiating power of LEP at < 25 weeks GA in human pregnancies may  
295 indicate a mechanistic role of LEP and HO-1 in the pathogenesis of PE, and deregulation of LEP  
296 as an indicator of impending PE.

297 We note that placenta-related proteins have distinct temporal patterns and share common  
298 characteristics between human and rodent pregnancies. sFlt-1 is upregulated in late gestation of  
299 pregnant women with PE or pregnant HO-1 Het mice. Elevated sFlt-1 levels late in gestation in  
300 mice are consistent with the findings of a previous study [28]. PlGF is upregulated after 14.5  
301 days GA in mice while significantly down-regulated after 27 weeks GA in humans with  
302 complicated pregnancies. LEP had a significant role in identifying PE or PE-like pregnancies of  
303 both human and mice. The maximum differentiating power of LEP is achieved at late gestation  
304 (18.5 days) in mice but in early gestation (< 25 weeks) in humans. The differences in placenta-  
305 related protein patterns between humans and mice may be explained by the different placental  
306 structures (e.g. a choriovitelline placenta is initially present in mice but absent in human;  
307 trophoblast cell invasion is restricted in mice but deep in human) and different placental  
308 endocrine functions [71-73]. Despite these differences, the similar physiological features shared  
309 in human and mouse placentas, and the associations between proteins and GA in both human and  
310 mice observed in our study, show that PE-related patterns found in human are preserved in mice.  
311 It also demonstrates that studies on rodent models can be used to study the biology of human  
312 pregnancy disorders.

313 This study has several limitations. First, the sample sizes for our human cohorts were

314 small, and our population lacked racial heterogeneity. Second, the time intervals of blood  
315 collections between two serial samples varied (3–31 weeks for normal, and 3–25 weeks for PE).  
316 Most samples were collected in the first or second trimester. Only 12 normal and 9 PE patients  
317 had samples collected in the third trimester. Third, serum concentrations of LEP can be  
318 influenced by maternal status [74, 75]. We addressed this through the normalization to maternal  
319 BMI (Additional file 6) and found the temporal pattern in LEP persisted. Fourth, variations in  
320 circulating protein levels could be due to the contributions from other tissues besides the  
321 placenta. Meta-analysis of PE and GA-matched uncomplicated pregnancy-associated placental  
322 gene expression patterns, including the targeted analytes of this study, has revealed similar  
323 expression trending along the gestations and differentiation between PE and normal controls  
324 [76]. Fifth, ELA was not included in the rodent analyses due to the lack of the robustness of the  
325 mouse ELISA assay. Sixth, although our protein candidates formed a panel of potential clinical  
326 utility to assess impending PE, the model robustness can be greatly improved by refinements  
327 using a sufficiently powered high time resolution cohort of sufficient powered sample size.

## 328 **CONCLUSIONS**

329         Longitudinal EN analysis of the circulating pregnancy-associated, placenta-related  
330 protein expression throughout pregnancy revealed patterns of the normal temporal progression of  
331 human gestation which can estimate GA. The elevated MSE of the EN metric, quantifying the  
332 malfunction of the estimation, offers a potential approach to identify impending PE. The protein  
333 markers in sera shared by human and mouse and their significant associations with GA are  
334 conserved. In addition, PE-related patterns found in human are preserved in normal and HO-1  
335 Het mice. This provides direct evidence of the causative action of HO-1 deficiency in LEP  
336 upregulation in a PE-like murine model. All of these demonstrate that the exploration of the



337 temporal expression patterns of the placenta-related proteins in rodent models can be used to  
338 study the biology of human pregnancy disorders like PE.

339           With our initial placental protein-based model for PE, follow-up studies with larger, high  
340 time resolution cohorts of frequent samplings at different GA need to be performed to not only  
341 validate our current findings but also reveal additional novel serological placental proteomics  
342 patterns diagnostics of other pregnancy-related complications. Future characterization of the  
343 pregnant HO-1 Het mouse PE model may shed mechanistic insights to support HO-1 causative  
344 and leptin associated pathways as important predictors of diverse pregnancy disorders and the  
345 therapeutic target for PE intervention.

346

## **LIST OF ABBREVIATIONS**

Preeclampsia: PE

Chorionic somatomammotropin hormone like 1: CSHL1

Leptin: LEP

Gestational age: GA

Soluble fms-like tyrosine kinase: sFlt-1

Placental growth factor: PIGF

Heme oxygenase-1: HO-1

Elabela: ELA

Wild-type: WT

Elastic net: EN

Mean squared error: MSE

Area under the curve: AUC

Receiver operating characteristic: ROC

Positive predictive value: PPV

Negative predictive value: NPV

Body mass index: BMI

## **DECLARATIONS**

### **Ethics, consent and permissions**

For the human study, approval was obtained from the Stanford University Institutional Review Board. Blood was collected at Stanford University Medical Center after informed consent was obtained. For the mouse study, approval was obtained from the Institutional Animal Care and Use Committee at Stanford University.

### **Consent for publication**

Not applicable.

### **Availability of data and materials**

The datasets used and/or analyzed in this study are available upon request to the corresponding author.

### **Competing interests**

The authors declare that they have no competing interests.

### **Funding**

This work was supported in part by the Stanford University Spark Spectrum Pilot Program and the March of the Dimes Prematurity Research Center at Stanford University, and Stanford Child Health Research Institute.

### **Authors' contributions**

XBL, KGS, and HJC contributed to the conception and design.

JY, HZ, LC, XL, RJW, and DKS contributed to the acquisition of data.

SH, YH, HZ, LZ, LT, IM, TL, YKB, VDW, NA, BG, MSA, XZ, YML, LM, GMS, RJW, DKS, and DBM contributed to the analysis and interpretation of data.

SH and XBL drafted the manuscript.

JY, HZ, LC, YH, LZ, LT, IM, XL, TL, RJW, YKB, VDM, NA, BG, MSA, XZ, YML, LM, GMS, DKS, HJC, DBM, and KGS critically revised the manuscript.

All the authors gave final approval of the version to be submitted and agreed to be accountable for all aspects of the work.

### **Acknowledgements**

The authors thank colleagues at the Stanford University Pediatric Proteomics group and the March of Dimes Prematurity Research Center at Stanford University for critical discussions.

## REFERENCES

1. Landek-Salgado MA, Gutenberg A, Lupi I, Kimura H, Mariotti S, Rose NR, Caturegli P: **Pregnancy, postpartum autoimmune thyroiditis, and autoimmune hypophysitis: intimate relationships.** *Autoimmun Rev* 2010, **9**(3):153-157.
2. Aghaepour N, Lehallier B, Baca Q, Ganio EA, Wong RJ, Ghaemi MS, Culos A, El-Sayed YY, Blumenfeld YJ, Druzin ML *et al*: **A Proteomic Clock of Human Pregnancy.** *American journal of obstetrics and gynecology* 2017.
3. Dugoff L, Hobbins JC, Malone FD, Vidaver J, Sullivan L, Canick JA, Lambert-Messerlian GM, Porter TF, Luthy DA, Comstock CH *et al*: **Quad screen as a predictor of adverse pregnancy outcome.** *Obstetrics and gynecology* 2005, **106**(2):260-267.
4. Yefet E, Kuzmin O, Schwartz N, Basson F, Nachum Z: **Predictive Value of Second-Trimester Biomarkers and Maternal Features for Adverse Pregnancy Outcomes.** *Fetal diagnosis and therapy* 2017.
5. Berg CJ, Mackay AP, Qin C, Callaghan WM: **Overview of maternal morbidity during hospitalization for labor and delivery in the United States: 1993-1997 and 2001-2005.** *Obstetrics and gynecology* 2009, **113**(5):1075-1081.
6. MacKay AP, Berg CJ, Atrash HK: **Pregnancy-related mortality from preeclampsia and eclampsia.** *Obstetrics and gynecology* 2001, **97**(4):533-538.
7. Powe CE, Levine RJ, Karumanchi SA: **Preeclampsia, a disease of the maternal endothelium: the role of antiangiogenic factors and implications for later cardiovascular disease.** *Circulation* 2011, **123**(24):2856-2869.
8. Samano R, Martinez-Rojano H, Chico-Barba G, Godinez-Martinez E, Sanchez-Jimenez B, Montiel-Ojeda D, Tolentino M: **Serum Concentration of Leptin in Pregnant Adolescents Correlated with Gestational Weight Gain, Postpartum Weight Retention and Newborn Weight/Length.** *Nutrients* 2017, **9**(10).
9. Muy-Rivera M, Ning Y, Frederic IO, Vadachkoria S, Luthy DA, Williams MA: **Leptin, soluble leptin receptor and leptin gene polymorphism in relation to preeclampsia risk.** *Physiological research / Academia Scientiarum Bohemoslovaca* 2005, **54**(2):167-174.
10. Ouyang Y, Chen H, Chen H: **Reduced plasma adiponectin and elevated leptin in preeclampsia.** *International journal of gynaecology and obstetrics: the official organ of the International Federation of Gynaecology and Obstetrics* 2007, **98**(2):110-114.
11. Naruse K, Yamasaki M, Umekage H, Sado T, Sakamoto Y, Morikawa H: **Peripheral blood concentrations of adiponectin, an adipocyte-specific plasma protein, in normal pregnancy and preeclampsia.** *Journal of reproductive immunology* 2005, **65**(1):65-75.
12. Hendler I, Blackwell SC, Mehta SH, Whitty JE, Russell E, Sorokin Y, Cotton DB: **The levels of leptin, adiponectin, and resistin in normal weight, overweight, and obese pregnant women with and without preeclampsia.** *American journal of obstetrics and gynecology* 2005, **193**(3 Pt 2):979-983.

13. Tommaselli GA, Pighetti M, Nasti A, D'Elia A, Guida M, Di Carlo C, Bifulco G, Nappi C: **Serum leptin levels and uterine Doppler flow velocimetry at 20 weeks' gestation as markers for the development of pre-eclampsia.** *Gynecol Endocrinol* 2004, **19**(3):160-165.
14. Ozkan S, Erel CT, Madazli R, Aydinli K: **Serum leptin levels in hypertensive disorder of pregnancy.** *European journal of obstetrics, gynecology, and reproductive biology* 2005, **120**(2):158-163.
15. Kocyigit Y, Bayhan G, Atamer A, Atamer Y: **Serum levels of leptin, insulin-like growth factor-I and insulin-like growth factor binding protein-3 in women with pre-eclampsia, and their relationship to insulin resistance.** *Gynecol Endocrinol* 2004, **18**(6):341-348.
16. Teppa RJ, Ness RB, Crombleholme WR, Roberts JM: **Free leptin is increased in normal pregnancy and further increased in preeclampsia.** *Metabolism: clinical and experimental* 2000, **49**(8):1043-1048.
17. Mise H, Sagawa N, Matsumoto T, Yura S, Nanno H, Itoh H, Mori T, Masuzaki H, Hosoda K, Ogawa Y *et al*: **Augmented placental production of leptin in preeclampsia: possible involvement of placental hypoxia.** *The Journal of clinical endocrinology and metabolism* 1998, **83**(9):3225-3229.
18. Muttukrishna S, North RA, Morris J, Schellenberg JC, Taylor RS, Asselin J, Ledger W, Groome N, Redman CW: **Serum inhibin A and activin A are elevated prior to the onset of pre-eclampsia.** *Hum Reprod* 2000, **15**(7):1640-1645.
19. Shibata E, Rajakumar A, Powers RW, Larkin RW, Gilmour C, Bodnar LM, Crombleholme WR, Ness RB, Roberts JM, Hubel CA: **Soluble fms-like tyrosine kinase 1 is increased in preeclampsia but not in normotensive pregnancies with small-for-gestational-age neonates: relationship to circulating placental growth factor.** *The Journal of clinical endocrinology and metabolism* 2005, **90**(8):4895-4903.
20. Maynard SE, Min JY, Merchan J, Lim KH, Li J, Mondal S, Libermann TA, Morgan JP, Sellke FW, Stillman IE *et al*: **Excess placental soluble fms-like tyrosine kinase 1 (sFlt1) may contribute to endothelial dysfunction, hypertension, and proteinuria in preeclampsia.** *The Journal of clinical investigation* 2003, **111**(5):649-658.
21. Wolf M, Shah A, Lam C, Martinez A, Smirnakis KV, Epstein FH, Taylor RN, Ecker JL, Karumanchi SA, Thadhani R: **Circulating levels of the antiangiogenic marker sFLT-1 are increased in first versus second pregnancies.** *American journal of obstetrics and gynecology* 2005, **193**(1):16-22.
22. Rajakumar A, Michael HM, Rajakumar PA, Shibata E, Hubel CA, Karumanchi SA, Thadhani R, Wolf M, Harger G, Markovic N: **Extra-placental expression of vascular endothelial growth factor receptor-1, (Flt-1) and soluble Flt-1 (sFlt-1), by peripheral blood mononuclear cells (PBMCs) in normotensive and preeclamptic pregnant women.** *Placenta* 2005, **26**(7):563-573.
23. Taylor AP, Rodriguez M, Adams K, Goldenberg DM, Blumenthal RD: **Altered tumor vessel maturation and proliferation in placenta growth factor-producing tumors: potential relationship to post-therapy tumor angiogenesis and recurrence.** *International journal of cancer Journal international du cancer* 2003, **105**(2):158-164.
24. Tidwell SC, Ho HN, Chiu WH, Torry RJ, Torry DS: **Low maternal serum levels of placenta growth factor as an antecedent of clinical preeclampsia.** *American journal of obstetrics and gynecology* 2001, **184**(6):1267-1272.

25. Torry DS, Wang HS, Wang TH, Caudle MR, Torry RJ: **Preeclampsia is associated with reduced serum levels of placenta growth factor.** *American journal of obstetrics and gynecology* 1998, **179**(6 Pt 1):1539-1544.
26. Stepan H, Schaarschmidt W, Jank A, Verlohren S, Kratzsch J: **[Use of angiogenic factors (sFlt-1/PIGF ratio) to confirm the diagnosis of preeclampsia in clinical routine: first experience].** *Zeitschrift fur Geburtshilfe und Neonatologie* 2010, **214**(6):234-238.
27. Verlohren S, Galindo A, Schlembach D, Zeisler H, Herraiz I, Moertl MG, Pape J, Dudenhausen JW, Denk B, Stepan H: **An automated method for the determination of the sFlt-1/PIGF ratio in the assessment of preeclampsia.** *American journal of obstetrics and gynecology* 2010, **202**(2):161 e161-161 e111.
28. Zhao H, Wong RJ, Kalish FS, Nayak NR, Stevenson DK: **Effect of heme oxygenase-1 deficiency on placental development.** *Placenta* 2009, **30**(10):861-868.
29. Ho L, van Dijk M, Chye STJ, Messerschmidt DM, Chng SC, Ong S, Yi LK, Boussata S, Goh GH, Afink GB *et al*: **ELABELA deficiency promotes preeclampsia and cardiovascular malformations in mice.** *Science* 2017, **357**(6352):707-713.
30. Spencer K, Cowans NJ, Nicolaides KH: **Maternal serum inhibin-A and activin-A levels in the first trimester of pregnancies developing pre-eclampsia.** *Ultrasound Obstet Gynecol* 2008, **32**(5):622-626.
31. Taylor BD, Ness RB, Olsen J, Hougaard DM, Skogstrand K, Roberts JM, Haggerty CL: **Serum leptin measured in early pregnancy is higher in women with preeclampsia compared with normotensive pregnant women.** *Hypertension* 2015, **65**(3):594-599.
32. Vaiman D, Mondon F, Garces-Duran A, Mignot TM, Robert B, Rebourcet R, Jammes H, Chelbi ST, Quetin F, Marceau G *et al*: **Hypoxia-activated genes from early placenta are elevated in preeclampsia, but not in Intra-Uterine Growth Retardation.** *BMC Genomics* 2005, **6**:111.
33. Zou H, Hastie T: **Regularization and variable selection via elastic net.** *J R Stat Soc B Methodol* 2005, **67**:301-320.
34. Aghaepour N, Ganio EA, McIlwain D, Tsai AS, Tingle M, Van Gassen S, Gaudilliere DK, Baca Q, McNeil L, Okada R *et al*: **An immune clock of human pregnancy.** *Sci Immunol* 2017, **2**(15).
35. Roberts JM, Hubel CA: **The two stage model of preeclampsia: variations on the theme.** *Placenta* 2009, **30 Suppl A**:S32-37.
36. Pavlicev M, Wagner GP, Chavan AR, Owens K, Maziarz J, Dunn-Fletcher C, Kallapur SG, Muglia L, Jones H: **Single-cell transcriptomics of the human placenta: inferring the cell communication network of the maternal-fetal interface.** *Genome research* 2017, **27**(3):349-361.
37. Burton GJ, Fowden AL: **The placenta: a multifaceted, transient organ.** *Philos Trans R Soc Lond B Biol Sci* 2015, **370**(1663):20140066.
38. Gynecologists ACoOa: **ACOG practice bulletin. Diagnosis and management of preeclampsia and eclampsia. Number 33, January 2002.** *Obstetrics and gynecology* 2002, **99**(1):159-167.
39. Lapaire O, Grill S, Lalevee S, Kolla V, Hosli I, Hahn S: **Microarray screening for novel preeclampsia biomarker candidates.** *Fetal diagnosis and therapy* 2012, **31**(3):147-153.

40. Nishizawa H, Pryor-Koishi K, Kato T, Kowa H, Kurahashi H, Udagawa Y: **Microarray analysis of differentially expressed fetal genes in placenta tissue derived from early and late onset severe preeclampsia.** *Placenta* 2007, **28**:487-497.
41. Loset M, Mundal SB, Johnson MP, Fenstad MH, Freed KA, Lian IA, Eide IP, Bjorge L, Blangero J, Moses EK *et al*: **A transcriptional profile of the decidua in preeclampsia.** *American journal of obstetrics and gynecology* 2011, **204**(1):84 e81-27.
42. Johansson A, Loset M, Mundal SB, Johnson MP, Freed KA, Fenstad MH, Moses EK, Austgulen R, Blangero J: **Partial correlation network analyses to detect altered gene interactions in human disease: using preeclampsia as a model.** *Human genetics* 2011, **129**(1):25-34.
43. Sitras V, Paulssen RH, Gronaas H, Leirvik J, Hanssen TA, Vartun A, Acharya G: **Differential placental gene expression in severe preeclampsia.** *Placenta* 2009, **30**(5):424-433.
44. Tsai S, Hardison NE, James AH, Motsinger-Reif AA, Bischoff SR, Thames BH, Piedrahita JA: **Transcriptional profiling of human placentas from pregnancies complicated by preeclampsia reveals dysregulation of sialic acid acetyltransferase and immune signalling pathways.** *Placenta* 2011, **32**(2):175-182.
45. Winn VD, Gormley M, Paquet AC, Kjaer-Sorensen K, Kramer A, Rumer KK, Haimov-Kochman R, Yeh RF, Overgaard MT, Varki A *et al*: **Severe preeclampsia-related changes in gene expression at the maternal-fetal interface include sialic acid-binding immunoglobulin-like lectin-6 and pappalysin-2.** *Endocrinology* 2009, **150**(1):452-462.
46. Kolla V, Jenö P, Moes S, Lapaire O, Hoesli I, Hahn S: **Quantitative proteomic (iTRAQ) analysis of 1st trimester maternal plasma samples in pregnancies at risk for preeclampsia.** *Journal of biomedicine & biotechnology* 2012, **2012**:305964.
47. Mary S, Patil GV, Kulkarni AV, Kulkarni MJ, Joshi SR, Mehendale SS, Giri AP: **Dynamic proteome in enigmatic preeclampsia: an account of molecular mechanisms and biomarker discovery.** *Proteomics Clinical applications* 2012, **6**(1-2):79-90.
48. Carty DM, Siwy J, Brennan JE, Zurbig P, Mullen W, Franke J, McCulloch JW, Roberts CT, North RA, Chappell LC *et al*: **Urinary proteomics for prediction of preeclampsia.** *Hypertension* 2011, **57**(3):561-569.
49. Erez O, Romero R, Maymon E, Chaemsathong P, Done B, Pacora P, Panaitescu B, Chaiworapongsa T, Hassan SS, Tarca AL: **The prediction of late-onset preeclampsia: Results from a longitudinal proteomics study.** *PloS one* 2017, **12**(7):e0181468.
50. Romero R, Erez O, Maymon E, Chaemsathong P, Xu Z, Pacora P, Chaiworapongsa T, Done B, Hassan SS, Tarca AL: **The maternal plasma proteome changes as a function of gestational age in normal pregnancy: a longitudinal study.** *American journal of obstetrics and gynecology* 2017, **217**(1):67 e61-67 e21.
51. Mosimann B, Amylidi-Mohr S, Holand K, Surbek D, Risch L, Raio L: **Importance of Timing First-Trimester Placental Growth Factor and Use of Serial First-Trimester Placental Growth Factor Measurements in Screening for Preeclampsia.** *Fetal diagnosis and therapy* 2017, **42**(2):111-116.
52. Schubring C, Englaro P, Siebler T, Blum WF, Demirakca T, Kratzsch J, Kiess W: **Longitudinal analysis of maternal serum leptin levels during pregnancy, at birth and up to six weeks after birth: relation to body mass index, skinfolds, sex steroids and umbilical cord blood leptin levels.** *Horm Res* 1998, **50**(5):276-283.

53. Hardie L, Trayhurn P, Abramovich D, Fowler P: **Circulating leptin in women: a longitudinal study in the menstrual cycle and during pregnancy.** *Clin Endocrinol (Oxf)* 1997, **47**(1):101-106.
54. Tessier DR, Ferraro ZM, Gruslin A: **Role of leptin in pregnancy: consequences of maternal obesity.** *Placenta* 2013, **34**(3):205-211.
55. Krauss T, Pauer HU, Augustin HG: **Prospective analysis of placenta growth factor (PIGF) concentrations in the plasma of women with normal pregnancy and pregnancies complicated by preeclampsia.** *Hypertension in pregnancy : official journal of the International Society for the Study of Hypertension in Pregnancy* 2004, **23**(1):101-111.
56. Hirashima C, Ohkuchi A, Arai F, Takahashi K, Suzuki H, Watanabe T, Kario K, Matsubara S, Suzuki M: **Establishing reference values for both total soluble Fms-like tyrosine kinase 1 and free placental growth factor in pregnant women.** *Hypertens Res* 2005, **28**(9):727-732.
57. Tsiakkas A, Duvdevani N, Wright A, Wright D, Nicolaides KH: **Serum soluble fms-like tyrosine kinase-1 in the three trimesters of pregnancy: effects of maternal characteristics and medical history.** *Ultrasound Obstet Gynecol* 2015, **45**(5):584-590.
58. Lage M, Garcia-Mayor RV, Tome MA, Cordido F, Valle-Inclan F, Considine RV, Caro JF, Dieguez C, Casanueva FF: **Serum leptin levels in women throughout pregnancy and the postpartum period and in women suffering spontaneous abortion.** *Clin Endocrinol (Oxf)* 1999, **50**(2):211-216.
59. Muttukrishna S, Fowler PA, George L, Groome NP, Knight PG: **Changes in peripheral serum levels of total activin A during the human menstrual cycle and pregnancy.** *The Journal of clinical endocrinology and metabolism* 1996, **81**(9):3328-3334.
60. Levine RJ, Maynard SE, Qian C, Lim KH, England LJ, Yu KF, Schisterman EF, Thadhani R, Sachs BP, Epstein FH *et al*: **Circulating angiogenic factors and the risk of preeclampsia.** *The New England journal of medicine* 2004, **350**(7):672-683.
61. Ning Y, Williams MA, Muy-Rivera M, Leisenring WM, Luthy DA: **Relationship of maternal plasma leptin and risk of pre-eclampsia: a prospective study.** *J Matern Fetal Neonatal Med* 2004, **15**(3):186-192.
62. Anim-Nyame N, Sooranna SR, Steer PJ, Johnson MR: **Longitudinal analysis of maternal plasma leptin concentrations during normal pregnancy and pre-eclampsia.** *Hum Reprod* 2000, **15**(9):2033-2036.
63. Magarinos MP, Sanchez-Margalet V, Kotler M, Calvo JC, Varone CL: **Leptin promotes cell proliferation and survival of trophoblastic cells.** *Biol Reprod* 2007, **76**(2):203-210.
64. Perez-Perez A, Toro AR, Vilarino-Garcia T, Guadix P, Maymo JL, Duenas JL, Varone CL, Sanchez-Margalet V: **Leptin reduces apoptosis triggered by high temperature in human placental villous explants: The role of the p53 pathway.** *Placenta* 2016, **42**:106-113.
65. Toro AR, Perez-Perez A, Corrales Gutierrez I, Sanchez-Margalet V, Varone CL: **Mechanisms involved in p53 downregulation by leptin in trophoblastic cells.** *Placenta* 2015, **36**(11):1266-1275.
66. Toro AR, Maymo JL, Ibarbalz FM, Perez-Perez A, Maskin B, Faletti AG, Sanchez-Margalet V, Varone CL: **Leptin is an anti-apoptotic effector in placental cells involving p53 downregulation.** *PLoS one* 2014, **9**(6):e99187.



67. Perez-Perez A, Maymo J, Gambino Y, Duenas JL, Goberna R, Varone C, Sanchez-Margalet V: **Leptin stimulates protein synthesis-activating translation machinery in human trophoblastic cells.** *Biol Reprod* 2009, **81**(5):826-832.
68. Perez-Perez A, Maymo J, Duenas JL, Goberna R, Calvo JC, Varone C, Sanchez-Margalet V: **Leptin prevents apoptosis of trophoblastic cells by activation of MAPK pathway.** *Arch Biochem Biophys* 2008, **477**(2):390-395.
69. Hoggard N, Haggarty P, Thomas L, Lea RG: **Leptin expression in placental and fetal tissues: does leptin have a functional role?** *Biochem Soc Trans* 2001, **29**(Pt 2):57-63.
70. Perez-Perez A, Toro A, Vilarino-Garcia T, Maymo J, Guadix P, Duenas JL, Fernandez-Sanchez M, Varone C, Sanchez-Margalet V: **Leptin action in normal and pathological pregnancies.** *J Cell Mol Med* 2018, **22**(2):716-727.
71. Cox B, Kotlyar M, Evangelou AI, Ignatchenko V, Ignatchenko A, Whiteley K, Jurisica I, Adamson SL, Rossant J, Kislinger T: **Comparative systems biology of human and mouse as a tool to guide the modeling of human placental pathology.** *Mol Syst Biol* 2009, **5**:279.
72. Malassine A, Frendo JL, Evain-Brion D: **A comparison of placental development and endocrine functions between the human and mouse model.** *Human reproduction update* 2003, **9**(6):531-539.
73. Soncin F, Khater M, To C, Pizzo D, Farah O, Wakeland A, Arul Nambi Rajan K, Nelson KK, Chang CW, Moretto-Zita M *et al*: **Comparative analysis of mouse and human placentae across gestation reveals species-specific regulators of placental development.** *Development* 2018, **145**(2).
74. Shaarawy M, el-Mallah SY: **Leptin and gestational weight gain: relation of maternal and cord blood leptin to birth weight.** *J Soc Gynecol Investig* 1999, **6**(2):70-73.
75. Karakosta P, Georgiou V, Fthenou E, Papadopoulou E, Roumeliotaki T, Margioris A, Castanas E, Kampa M, Kogevas M, Chatzi L: **Maternal weight status, cord blood leptin and fetal growth: a prospective mother-child cohort study (Rhea study).** *Paediatric and perinatal epidemiology* 2013, **27**(5):461-471.
76. Liu LY, Yang T, Ji J, Wen Q, Morgan AA, Jin B, Chen G, Lyell DJ, Stevenson DK, Ling XB *et al*: **Integrating multiple 'omics' analyses identifies serological protein biomarkers for preeclampsia.** *BMC Med* 2013, **11**:236.

## FIGURE LEGENDS

**Fig. 1.** (A) Serial blood sampling from normal term and PE subjects at different GAs. Times of sample collections, infant deliveries, suspected PE, and confirmatory PE diagnoses of individual women (denoted by each row) are represented by black circles, black squares, red unfilled triangles, and red-filled triangles, respectively. (B) The EN model, developed with serial sampling analysis of 6 placenta-related proteins, dating GAs. Left panel: training cohort using

sera from normal term pregnancies; middle and right panels: validation cohort using sera from normal term or PE pregnancies.

**Fig. 2.** Maternal serum concentrations of 6 studied placenta-related proteins plotted as a function of the GA. Normal term pregnancies: green line. PE pregnancies: red line. Loess smooth function was applied. Color-coded dotted lines show the 95% confidence interval for each cohort.

**Fig. 3.** Mean squared error (MSE) of the EN model used to classify testing normal from PE. Mann-Whitney U-test *P*-value was calculated. The cut-off point (grey dotted line) shows the maximum value of the sum square of the sensitivity and 1-specificity on classification of training normal and PE cohorts at blood sampling at 0–30 weeks and 16–30 weeks GAs.

**Fig. 4.** The 5-protein EN model dating GA. Left: normal human term and PE pregnancies. Right: WT and HO-1 Het mouse pregnancies (right). RMSE: root mean square error.

## SUPPORTING INFORMATION

**Additional file 1.** Performance of EN model with respect to  $\alpha$  and  $\lambda$  in our training cohort. Left:  $R^2$ - value of the model with respect to  $\alpha$  when  $\lambda$  was set to give the minimum cross-validation mean squared error (MSE). Right: Cross-validation MSE with respect to  $\lambda$  when  $\alpha = 1$ .

**Additional file 2.** Serial blood collection from pregnant WT (left) and HO-1 Het (right) mice at different GAs. Sample collection days and individual mice are represented by filled circles and lines, respectively.

**Additional file 3.** Univariate analysis of serum protein concentrations with respect to GA. Linear regression coefficients as well as 95% confidence interval and Spearman *P*-values of each protein with respect to the current GA are shown.

**Additional file 4.** Coefficients of each protein analyte in the EN model. Positive and negative values indicate positive and negative correlations, respectively, between GA and the serum protein concentrations.

**Additional file 5.** Maternal serum concentrations of the 6 placenta-related proteins plotted at different GA intervals during pregnancy. Mann-Whitney U-test *P*-values are shown.

**Additional file 6.** Maternal serum concentrations of LEP (left) and LEP normalized to body mass index (BMI) (pg/mL/kg/m<sup>2</sup>) (right) shown as a function of GA in normal term (red line) and PE (green line) pregnancies. Loess smooth function was applied. Color-coded dotted lines: show the 90% confidence interval for each cohort.

**Additional file 7.** The mean square error (MSE) of the GA model metric was used to classify training normal from PE subjects. Mann-Whitney U-test *P*-values are shown. The cutoff levels (grey dotted lines) show the maximum value of the sum square of sensitivity and 1-specificity on classification of normal pregnancies and pregnancies with PE.

**Additional file 8.** The EN model ( $\alpha = 0.79$ ), developed with serial sampling analysis of 5 placenta-related proteins, used for dating GAs. Left panel: shows our training cohort (normal term sera); middle and right panels show prospective testing of our EN model using normal or PE serum from serially-collected blood samples.

**Additional file 9.** Serum levels of the 5 placenta-related proteins were plotted as a function of the GA during human (left) and mouse (right) pregnancies. Loess smooth function was applied. Red: PE. Green: normal. Dotted line: 95% confidence interval.

**Fig. 1****A**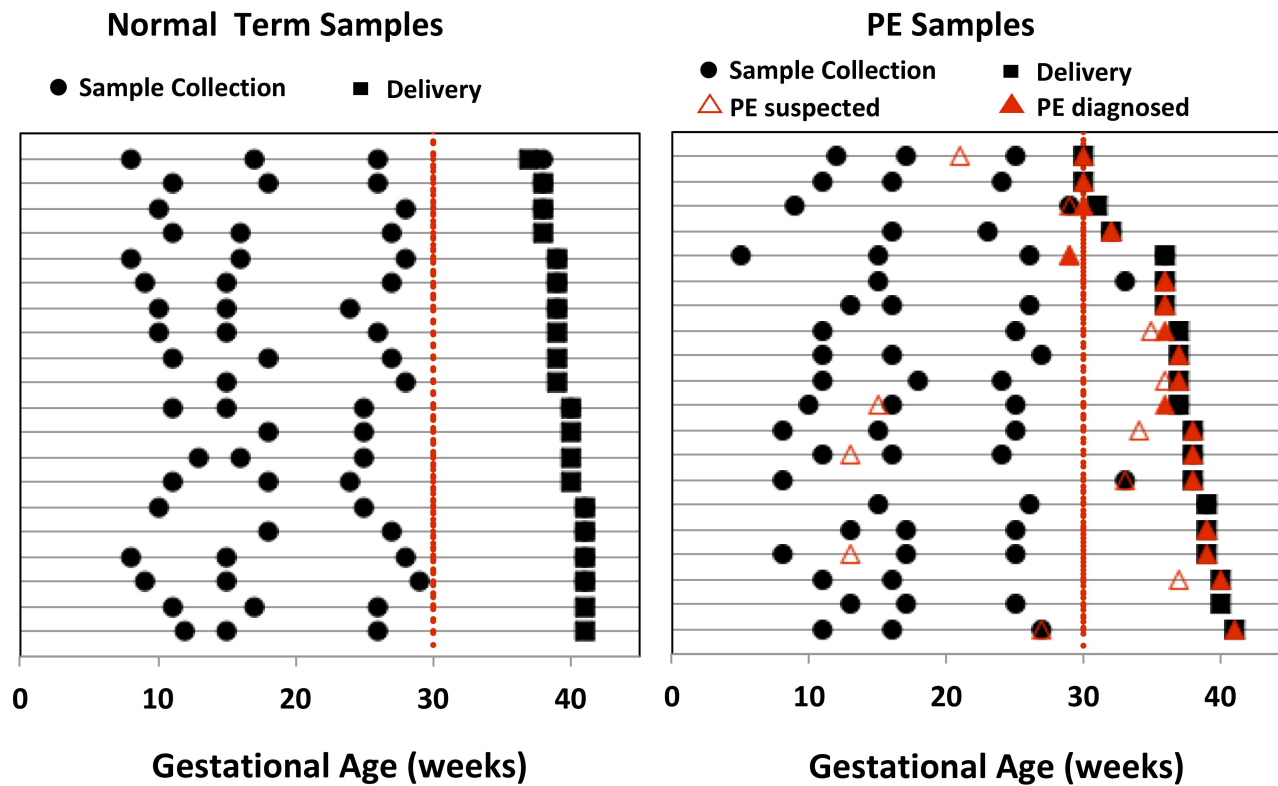**B**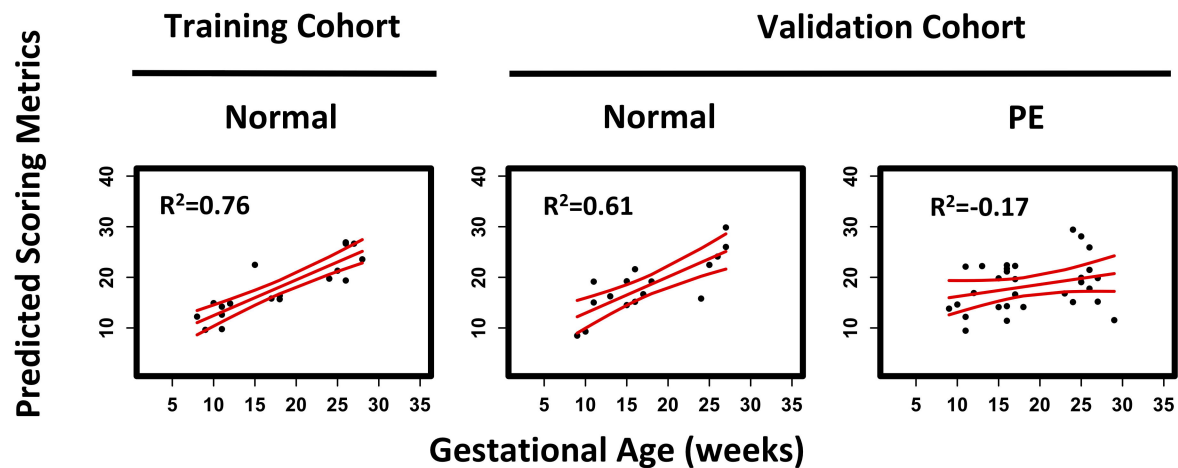

Fig. 2

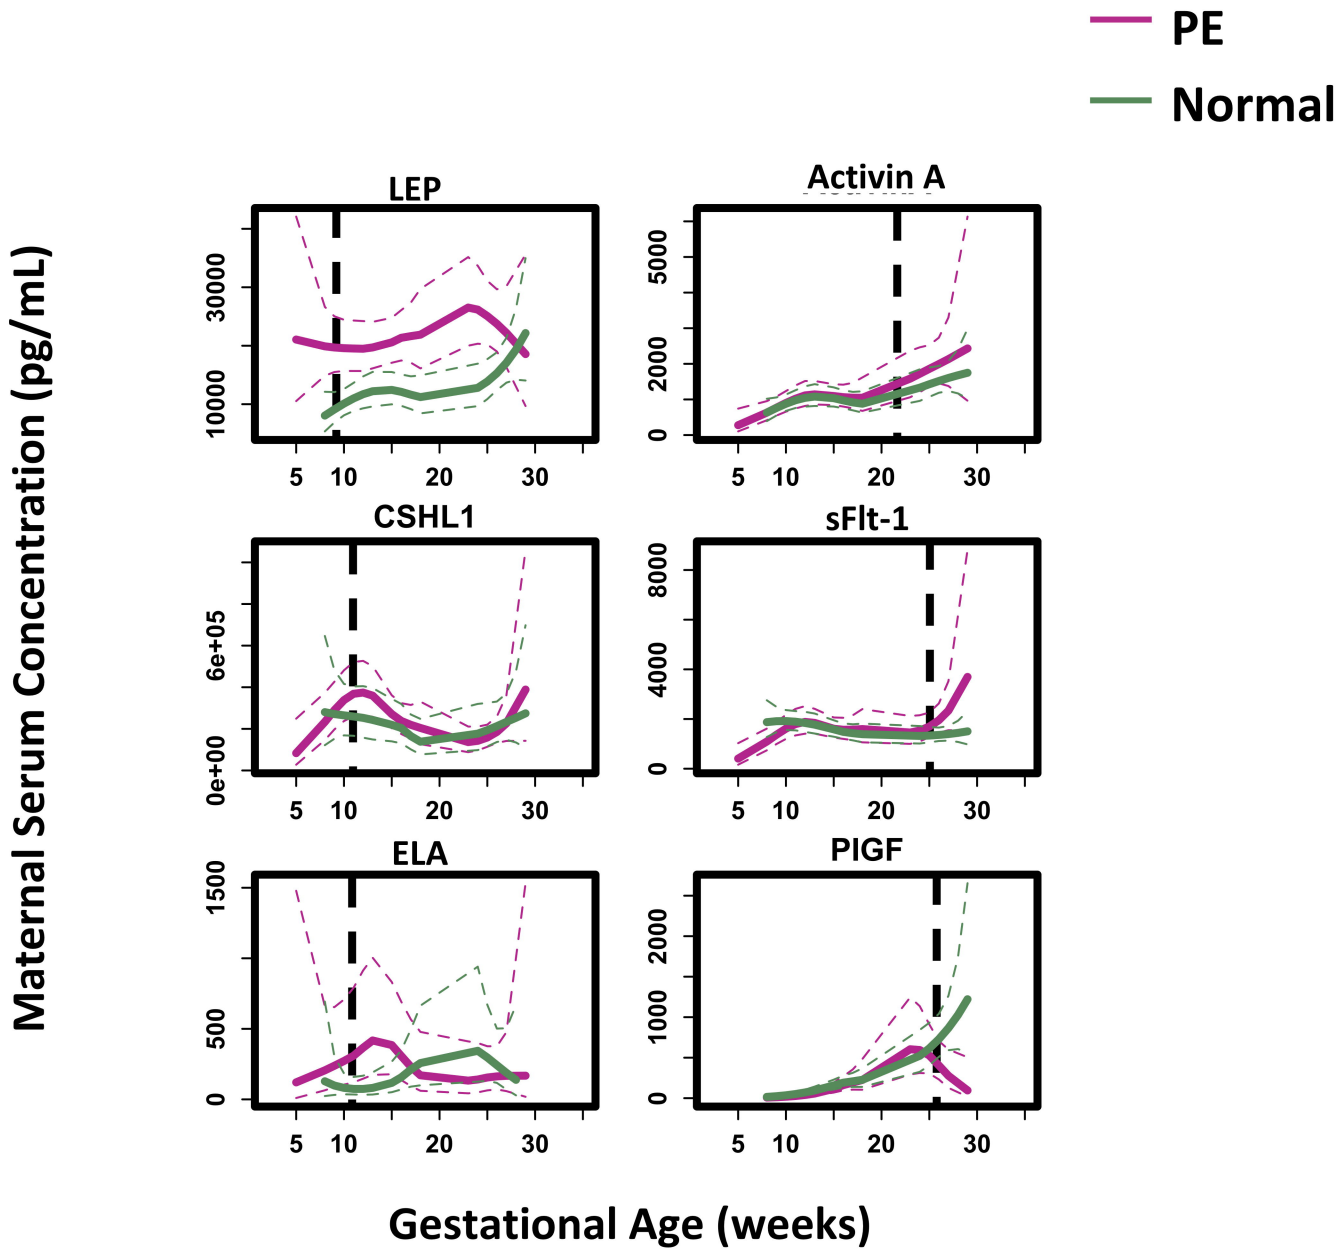

**Fig. 3**

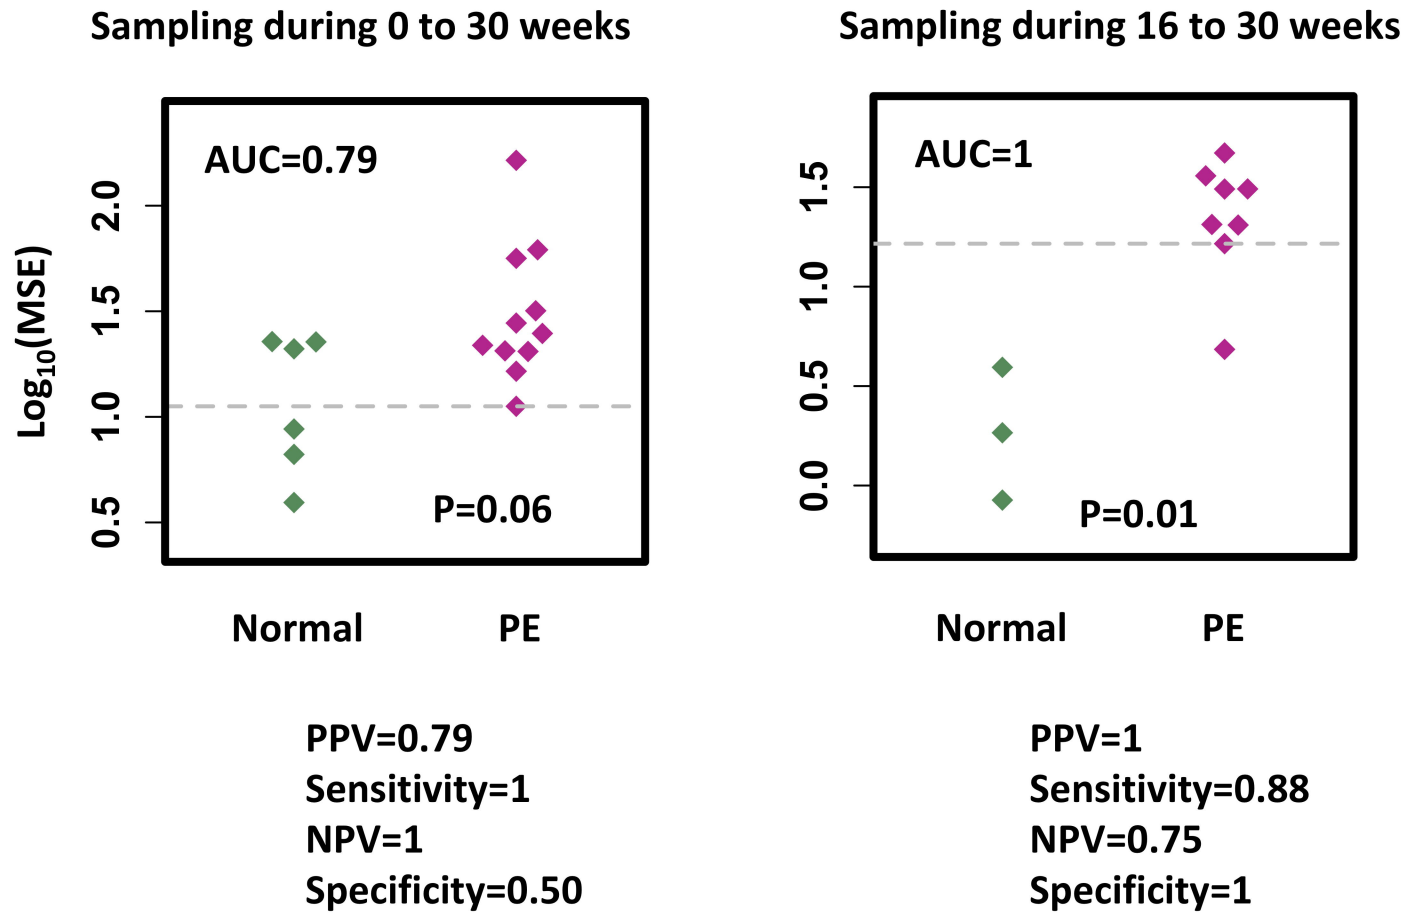

Fig. 4

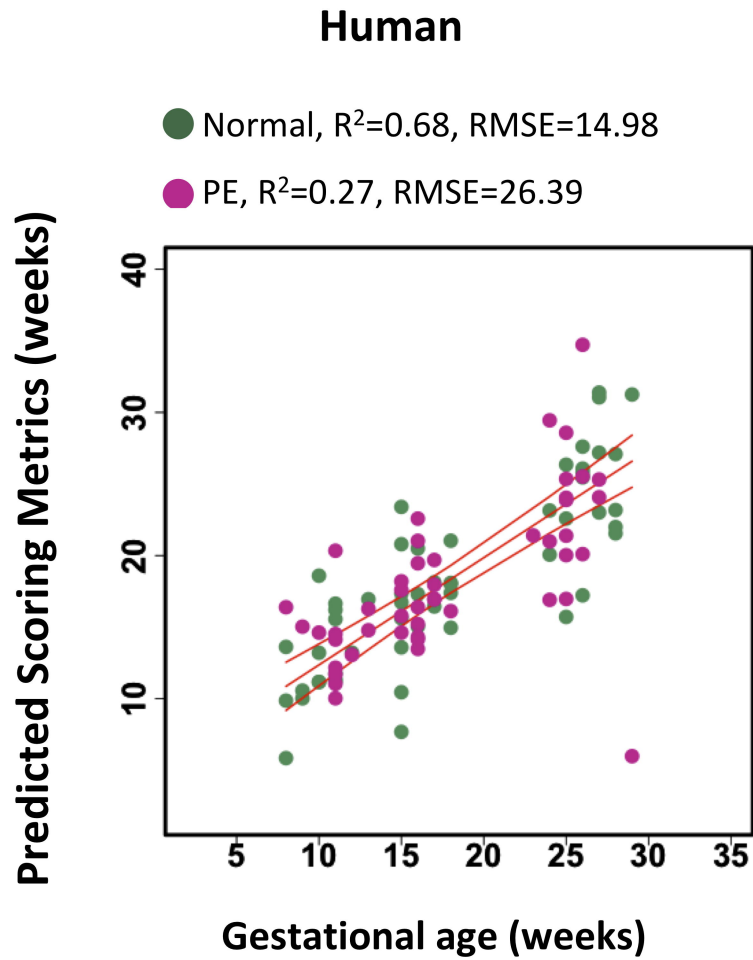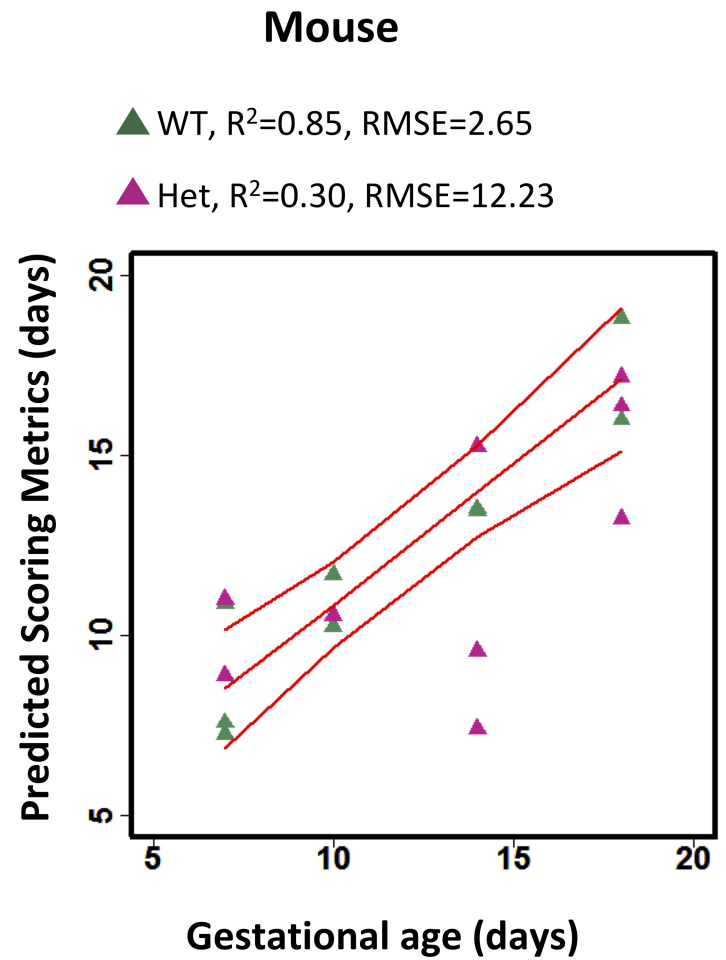

Source: https://biorxiv.org/content/biorxiv/early/2018/09/26/425306.full-text.pdf
